# Supplementary material
Source: publisher site journal article supplement (https://www.dovepress.com/get_supplementary_file.php?f=285045.xlsx)
Supplement: Supplementary file 1 [file get_supplementary_file.php]

## Sheet: Hospitals data
	Table S1: Input and Output data of public hospitals for maternal health services provision
	Outputs			Inputs			anc/sal	del/sal	pnc/sal	anc/non	del/non	pnc/non	anc/bed	deli/bed	pnc/bed
DMUs	ANC	Skilled Delivery	PNC	Sal exp (US$)	Non-sal exp (US$)	No of beds
H01	14208	11066	6044	1337061	276202	130	0.0106263	0.00827636	0.00452036	0.0514406	0.0400649	0.0218825	109.292	85.1231	46.4923
H02	1016	1203	1215	104254	7389.43	14	0.00974545	0.0115391	0.0116543	0.137494	0.1628	0.164424	72.5714	85.9286	86.7857
H03	2916	1525	1649	125889	19151.2	20	0.0231633	0.0121139	0.0130989	0.152262	0.0796296	0.0861044	145.8	76.25	82.45
H04	437	634	589	83049.3	13218.7	21	0.00526193	0.00763402	0.00709217	0.0330593	0.0479624	0.0445581	20.8095	30.1905	28.0476
H05	4539	4424	48	155836	51590.7	25	0.0291268	0.0283888	0.000308016	0.087981	0.0857519	0.0009304	181.56	176.96	1.92
H06	1530	1423	1472	32559.1	34789	25	0.0469914	0.0437051	0.0452101	0.0439795	0.0409038	0.0423123	61.2	56.92	58.88
H07	609	519	521	71452.9	36235.3	14	0.00852309	0.00726352	0.00729151	0.0168068	0.014323	0.0143782	43.5	37.0714	37.2143
H08	1027	980	891	31463.1	5680.04	15	0.0326414	0.0311476	0.0283189	0.180809	0.172534	0.156865	68.4667	65.3333	59.4
H09	1834	2154	1715	147357	13555.2	6	0.012446	0.0146176	0.0116384	0.135299	0.158906	0.12652	305.667	359	285.833
H10	901	605	504	76099.2	8323.61	8	0.0118398	0.00795015	0.00662294	0.108246	0.0726848	0.0605506	112.625	75.625	63
H11	1010	497	449	56944.4	6918.78	12	0.0177366	0.00872781	0.00788489	0.145979	0.0718334	0.0648958	84.1667	41.4167	37.4167
H12	1865	1693	1249	81741.5	4480.58	7	0.0228158	0.0207116	0.0152799	0.416241	0.377853	0.278759	266.429	241.857	178.429

## Sheet: DEA
Table S2: Input and output data used for DEA analysis
14208	11066	6044	1337061	276202	130
1016	1203	1215	104254	7389.43	14
2916	1525	1649	125889	19151.2	20
437	634	589	83049.3	13218.7	21
4539	4424	48	155836	51590.7	25
1530	1423	1472	32559.1	34789	25
609	519	521	71452.9	36235.3	14
1027	980	891	31463.1	5680.04	15
1834	2154	1715	147357	13555.2	6
901	605	504	76099.2	8323.61	8
1010	497	449	56944.4	6918.78	12
1865	1693	1249	81741.5	4480.58	7
